# Supplementary material for: How does age-related macular degeneration affect real-world visual ability and quality of life? A systematic review
Source: PubMed Central journal article supplement — BMJ Open. 2016 Dec 2;6(12):e011504. doi: 10.1136/bmjopen-2016-011504 (PMC5168634; doi:10.1136/bmjopen-2016-011504), 2016-12-02
Supplement: bmjopen-2016-011504supp_appendix1.pdf [file bmjopen-2016-011504supp_appendix1.pdf]

### **Keywords used in literature search**

("age related macular degeneration" or "age related maculopathy" or AMD or ARMD or "geographic atrophy" or nAMD)

AND

("quality adj1 life" or QoL or "vis\* function" or "vis\* dysfunction" or "vis\* ability" or "vis\* disability" or function\* or performance or "real world" or everyday or "daily living" or "daily life" or behavior or "independent living" or "well being" or wellbeing or "self concept" or "personal satisfaction" or "patient satisfaction" or depress\* or anxiet\* or "psychological impact" or reading or searching or shopping or falls or driving or mobility or "face recogni\*" or "face detecti\*" or "facial recogni\*" or facial detecti\*" or ADL or IADL)
