# Supplementary material for: How does age-related macular degeneration affect real-world visual ability and quality of life? A systematic review
Source: PubMed Central journal article supplement — BMJ Open. 2016 Dec 2;6(12):e011504. doi: 10.1136/bmjopen-2016-011504 (PMC5168634; doi:10.1136/bmjopen-2016-011504), 2016-12-02
Supplement: bmjopen-2016-011504supp_appendix3.pdf [file bmjopen-2016-011504supp_appendix3.pdf]

**Appendix 3: Quality appraisal**

For full details of grading criteria, please refer to Table 2 in article.

| Study                     | Study type                                       | MMAT Criterion |            |            |     | MMAT Score |
|---------------------------|--------------------------------------------------|----------------|------------|------------|-----|------------|
|                           |                                                  | 1              | 2          | 3          | 4   |            |
| Alexander et al (1988)    | Case series<br>(Quantitative descriptive)        | Yes            | Yes        | Yes        | Yes | 4          |
| Alexander et al (2014a)   | Case-control<br>(Quantitative non-randomised)    | Yes            | Yes        | Yes        | Yes | 4          |
| Alexander et al (2014b)   | Cross sectional<br>(Quantitative non-randomised) | Yes            | Yes        | Can't tell | Yes | 3          |
| Aspinall et al (2014)     | Case-control<br>(Quantitative non-randomised)    | Yes            | Yes        | Can't tell | Yes | 3          |
| Augustin et al (2007)     | Cross sectional<br>(Quantitative non-randomised) | Yes            | Yes        | Yes        | Yes | 4          |
| Backman & Williams (2002) | Case series<br>(Quantitative descriptive)        | No             | Can't tell | Yes        | Yes | 2          |
| Banerjee et al (2007)     | Cross sectional<br>(Quantitative non-randomised) | Yes            | Yes        | Yes        | Yes | 4          |
| Bansback et al (2007)     | Cross sectional<br>(Quantitative non-randomised) | Yes            | Yes        | Yes        | No  | 3          |
| Bass et al (2004)         | Cross sectional<br>(Quantitative non-randomised) | Yes            | Yes        | Yes        | Yes | 4          |
| Berdeaux et al (2005)     | Cross sectional<br>(Quantitative non-randomised) | Yes            | Yes        | Yes        | Yes | 4          |
| Bordier et al (2011)      | Case-control<br>(Quantitative non-randomised)    | Can't tell     | Yes        | Can't tell | Yes | 2          |
| Boucart et al (2008a)     | Case-control<br>(Quantitative non-randomised)    | No             | Yes        | No         | Yes | 2          |
| Boucart et al (2008b)     | Case-control<br>(Quantitative non-randomised)    | Yes            | Yes        | Yes        | Yes | 4          |
| Boucart et al (2013)      | Case-control<br>(Quantitative non-randomised)    | Yes            | Yes        | Can't tell | Yes | 3          |
| Brody et al (2001)        | Cross sectional<br>(Quantitative non-randomised) | Yes            | Yes        | Yes        | Yes | 4          |
| Brown et al (1986)        | Case-control<br>(Quantitative non-randomised)    | Can't tell     | Yes        | Yes        | Yes | 3          |
| Brown et al (2000)        | Cross sectional<br>(Quantitative non-randomised) | Yes            | Yes        | Yes        | Yes | 4          |
| Brown et al (2002)        | Cross sectional<br>(Quantitative non-randomised) | Yes            | Yes        | Yes        | Yes | 4          |
| Bullimore et al (1991)    | Case-control<br>(Quantitative non-randomised)    | Yes            | Yes        | Can't tell | Yes | 3          |
| Burton et al (2015)       | Qualitative                                      | Yes            | Yes        | No         | No  | 2          |

|                           |                                                  |     |     |            |     |   |
|---------------------------|--------------------------------------------------|-----|-----|------------|-----|---|
| Butt et al (2013)         | Cross sectional<br>(Quantitative non-randomised) | Yes | Yes | Can't tell | Yes | 3 |
| Cahill et al (2005)       | Cross sectional<br>(Quantitative non-randomised) | Yes | Yes | Yes        | Yes | 4 |
| Casten et al (2002)       | Cross sectional<br>(Quantitative non-randomised) | Yes | Yes | Yes        | Yes | 4 |
| Cavar et al (2014)        | Case-control<br>(Quantitative non-randomised)    | Yes | Yes | Yes        | Yes | 4 |
| Chia et al (2004)         | Cross sectional<br>(Quantitative non-randomised) | Yes | Yes | Yes        | Yes | 4 |
| Cimarolli et al (2012)    | Qualitative                                      | Yes | Yes | No         | Yes | 3 |
| Clemons et al (2003)      | Cohort<br>(Quantitative non-randomised)          | Yes | Yes | Yes        | Yes | 4 |
| Coleman et al (2010)      | Cohort<br>(Quantitative non-randomised)          | Yes | Yes | Yes        | No  | 3 |
| Cruess et al (2007)       | Cross sectional<br>(Quantitative non-randomised) | Yes | Yes | Yes        | Yes | 4 |
| Curriero et al (2013)     | Case-control<br>(Quantitative non-randomised)    | Yes | Yes | Yes        | Yes | 4 |
| Davis et al (1995)        | Case-control<br>(Quantitative non-randomised)    | Yes | Yes | No         | Yes | 3 |
| Decarlo et al (2003)      | Cross sectional<br>(Quantitative non-randomised) | Yes | Yes | Yes        | Yes | 4 |
| Dong et al (2004)         | Cross sectional<br>(Quantitative non-randomised) | Yes | Yes | Yes        | Yes | 4 |
| Elliott et al (1995)      | Case-control<br>(Quantitative non-randomised)    | Yes | Yes | Yes        | Yes | 4 |
| Eramudugolla et al (2013) | Cross sectional<br>(Quantitative non-randomised) | Yes | Yes | Yes        | No  | 3 |
| Espallargues et al (2005) | Cross sectional<br>(Quantitative non-randomised) | Yes | Yes | Can't tell | No  | 2 |
| Esteban et al (2007)      | Cross sectional<br>(Quantitative non-randomised) | Yes | No  | Yes        | Yes | 3 |
| Fletcher et al (2008)     | Case report<br>(Quantitative descriptive)        | No  | No  | Yes        | N/A | 2 |
| Geruschat et al (2006)    | Case-control<br>(Quantitative non-randomised)    | No  | Yes | Yes        | No  | 2 |
| Geruschat et al (2006)    | Case-control<br>(Quantitative non-randomised)    | No  | Yes | Yes        | Yes | 3 |
| Gopinath et al (2013)     | Cohort<br>(Quantitative non-randomised)          | Yes | Yes | Yes        | Yes | 4 |
| Hassan et al (2002)       | Case-control<br>(Quantitative non-randomised)    | Yes | Yes | Yes        | Yes | 4 |

|                                                                                                                     |                                                  |     |     |            |     |   |
|---------------------------------------------------------------------------------------------------------------------|--------------------------------------------------|-----|-----|------------|-----|---|
| Hassan et al (2005)                                                                                                 | Case-control<br>(Quantitative non-randomised)    | Yes | Yes | Can't tell | Yes | 3 |
| Hassan & Snyder (2012)                                                                                              | Case-control<br>(Quantitative non-randomised)    | No  | Yes | Yes        | Yes | 3 |
| Hassell et al (2006)                                                                                                | Cross sectional<br>(Quantitative non-randomised) | Yes | Yes | Yes        | Yes | 4 |
| Hochberg et al (2012)                                                                                               | Cross sectional<br>(Quantitative non-randomised) | Yes | Yes | Yes        | Yes | 4 |
| Ivanoff et al (2000)                                                                                                | Cross sectional<br>(Quantitative non-randomised) | Yes | Yes | Can't tell | Yes | 3 |
| Jacko et al (2000)                                                                                                  | Case-control<br>(Quantitative non-randomised)    | Yes | Yes | Can't tell | Yes | 3 |
| Jacko et al (2001)                                                                                                  | Case-control<br>(Quantitative non-randomised)    | No  | Yes | No         | Yes | 2 |
| Jacko et al (2002)                                                                                                  | Case-control<br>(Quantitative non-randomised)    | No  | Yes | No         | Yes | 2 |
| Jacko et al (2005)                                                                                                  | Case-control<br>(Quantitative non-randomised)    | Yes | Yes | Yes        | Yes | 3 |
| Johnson et al (2014)                                                                                                | Case report<br>(Quantitative descriptive)        | Yes | No  | Yes        | N/A | 3 |
| Jivraj et al (2013)                                                                                                 | Cross sectional<br>(Quantitative non-randomised) | Yes | Yes | Yes        | Yes | 4 |
| Kleinschmidt et al (2013)                                                                                           | Qualitative                                      | Yes | Yes | Yes        | No  | 3 |
| Knudtson et al (2005)                                                                                               | Cross sectional<br>(Quantitative non-randomised) | Yes | Yes | Yes        | Yes | 4 |
| Kotecha et al (2013)                                                                                                | Case-control<br>(Quantitative non-randomised)    | Yes | Yes | Yes        | Yes | 4 |
| Kuyk & Elliott (1999)                                                                                               | Case-control<br>(Quantitative non-randomised)    | Yes | Yes | Yes        | Yes | 4 |
| Lamoureux et al (2011)                                                                                              | Cross sectional<br>(Quantitative non-randomised) | Yes | Yes | Yes        | Yes | 4 |
| Lin & Yu (2012)                                                                                                     | Cross sectional<br>(Quantitative non-randomised) | Yes | Yes | Yes        | Yes | 4 |
| Lopez-Miguel et al (2013)                                                                                           | Cross sectional<br>(Quantitative non-randomised) | Yes | Yes | Yes        | Yes | 4 |
| Lotery et al (2007)                                                                                                 | Cross sectional<br>(Quantitative non-randomised) | Yes | Yes | Yes        | Yes | 4 |
| Lovie-Kitchin & Brown (1986)                                                                                        | Case-control<br>(Quantitative non-randomised)    | Yes | Yes | No         | Yes | 3 |
| Maguire et al (2004)<br>Complications of Age-Related<br>Macular Degeneration<br>Prevention Trial Research<br>Group. | Cross sectional<br>(Quantitative non-randomised) | Yes | Yes | Yes        | Yes | 4 |

|                          |                                                  |     |     |     |     |   |
|--------------------------|--------------------------------------------------|-----|-----|-----|-----|---|
| Mangione et al (1999)    | Cross sectional<br>(Quantitative non-randomised) | Yes | Yes | Yes | No  | 3 |
| Marback et al (2007)     | Cross sectional<br>(Quantitative non-randomised) | Yes | Yes | Yes | Yes | 4 |
| Mathew et al (2010)      | Cross sectional<br>(Quantitative non-randomised) | Yes | Yes | Yes | Yes | 4 |
| McCloud et al (2014)     | Qualitative                                      | Yes | Yes | Yes | Yes | 4 |
| McGwin Jr et al (2013)   | Cohort<br>(Quantitative non-randomised)          | Yes | Yes | Yes | Yes | 4 |
| Moore (2000)             | Qualitative                                      | Yes | Yes | Yes | Yes | 4 |
| Moore & Miller (2003)    | Qualitative                                      | Yes | Yes | No  | No  | 2 |
| Moore & Miller (2005)    | Qualitative                                      | Yes | Yes | No  | No  | 2 |
| Musel et al (2011)       | Case-control<br>(Quantitative non-randomised)    | Yes | Yes | Yes | Yes | 4 |
| Owsley et al (2006)      | Qualitative                                      | Yes | Yes | Yes | Yes | 4 |
| Popescu et al (2011)     | Cross sectional<br>(Quantitative non-randomised) | Yes | Yes | Yes | Yes | 4 |
| Popescu et al (2012)     | Case-control<br>(Quantitative non-randomised)    | Yes | Yes | Yes | Yes | 4 |
| Rovner & Casten (2001)   | Cohort<br>(Quantitative non-randomised)          | Yes | Yes | Yes | Yes | 4 |
| Rovner & Casten (2002)   | Longitudinal<br>(Quantitative non-randomised)    | Yes | Yes | Yes | Yes | 4 |
| Rovner et al (2002)      | Cohort<br>(Quantitative non-randomised)          | Yes | Yes | Yes | Yes | 4 |
| Rovner et al (2006)      | Cross sectional<br>(Quantitative non-randomised) | Yes | Yes | Yes | Yes | 4 |
| Rovner et al (2011)      | Longitudinal<br>(Quantitative non-randomised)    | Yes | Yes | Yes | Yes | 4 |
| Rovner et al (2014)      | Cross sectional<br>(Quantitative non-randomised) | Yes | Yes | Yes | Yes | 4 |
| Ruiz-Moreno et al (2008) | Cross sectional<br>(Quantitative non-randomised) | Yes | Yes | Yes | Yes | 4 |
| Sahel et al (2007)       | Cross sectional<br>(Quantitative non-randomised) | Yes | Yes | Yes | Yes | 4 |
| Schilling et al (2006)   | Longitudinal<br>(Quantitative descriptive)       | Yes | Yes | Yes | Yes | 4 |
| Schilling et al (2013)   | Longitudinal<br>(Quantitative descriptive)       | Yes | Yes | Yes | Yes | 4 |
| Scilley et al (2002)     | Cross sectional<br>(Quantitative non-randomised) | Yes | Yes | Yes | Yes | 4 |
| Scott et al (2002a)      | Case series<br>(Quantitative descriptive)        | Yes | Yes | Yes | N/A | 4 |

|                          |                                                  |     |     |            |     |   |
|--------------------------|--------------------------------------------------|-----|-----|------------|-----|---|
| Scott et al (2002b)      | Case series<br>(Quantitative descriptive)        | Yes | Yes | Yes        | Yes | 4 |
| Seiple et al (2013)      | Case-control<br>(Quantitative non-randomised)    | Yes | Yes | Can't tell | Yes | 3 |
| Seland et al (2011)      | Cross sectional<br>(Quantitative non-randomised) | Yes | Yes | Yes        | Yes | 4 |
| Sengupta et al (2014)    | Cross sectional<br>(Quantitative non-randomised) | Yes | Yes | Yes        | Yes | 4 |
| Siaudvytyte et al (2012) | Cross sectional<br>(Quantitative non-randomised) | Yes | Yes | No         | Yes | 3 |
| Smith (2008)             | Qualitative                                      | Yes | Yes | No         | Yes | 3 |
| Soubrane et al (2007)    | Cross sectional<br>(Quantitative non-randomised) | Yes | Yes | Yes        | Yes | 4 |
| Spaulding et al (1994)   | Case-control<br>(Quantitative non-randomised)    | Yes | Yes | Yes        | Yes | 4 |
| Spaulding et al (1995)   | Case-control<br>(Quantitative non-randomised)    | Yes | Yes | Can't tell | Yes | 3 |
| Stanford et al (2009)    | Qualitative                                      | Yes | Yes | Yes        | Yes | 4 |
| Stein et al (2003)       | Cross sectional<br>(Quantitative non-randomised) | Yes | Yes | Yes        | Yes | 4 |
| Stevenson et al (2004)   | Cross sectional<br>(Quantitative non-randomised) | Yes | Yes | Yes        | Yes | 4 |
| Sun et al (2007)         | Cross sectional<br>(Quantitative non-randomised) | Yes | Yes | Yes        | Yes | 4 |
| Szabo et al (2008)       | Cross sectional<br>(Quantitative non-randomised) | Yes | Yes | Yes        | Yes | 4 |
| Szabo et al (2010)       | Cohort<br>(Quantitative non-randomised)          | Yes | Yes | Yes        | Yes | 4 |
| Szlyk et al (1995)       | Case-control<br>(Quantitative non-randomised)    | Yes | Yes | Can't tell | Yes | 3 |
| Tejeria et al (2002)     | Cross sectional<br>(Quantitative non-randomised) | Yes | Yes | Yes        | Yes | 4 |
| Thibaut et al (2014)     | Case-control<br>(Quantitative non-randomised)    | Yes | Yes | No         | Yes | 3 |
| Timberlake et al (2011)  | Case-control<br>(Quantitative non-randomised)    | Yes | Yes | Yes        | Yes | 4 |
| Timberlake et al (2013)  | Case-control<br>(Quantitative non-randomised)    | No  | Yes | Yes        | Yes | 3 |
| Tolman et al (2005)      | Cross sectional<br>(Quantitative descriptive)    | Yes | Yes | Yes        | Yes | 4 |
| Tran et al (2010)        | Case-control<br>(Quantitative non-randomised)    | Yes | Yes | Can't tell | Yes | 3 |
| Tran et al (2011)        | Case-control<br>(Quantitative non-randomised)    | Yes | Yes | Can't tell | Yes | 3 |

|                             |                                                  |     |     |            |     |   |
|-----------------------------|--------------------------------------------------|-----|-----|------------|-----|---|
| Tran et al (2012)           | Case-control<br>(Quantitative non-randomised)    | Yes | Yes | Can't tell | Yes | 3 |
| Tran et al (2014)           | Case-control<br>(Quantitative non-randomised)    | Yes | Yes | Can't tell | Yes | 3 |
| van Landingham et al (2014) | Cross sectional<br>(Quantitative non-randomised) | Yes | Yes | Yes        | Yes | 4 |
| Wahl et al (2003)           | Cross sectional<br>(Quantitative non-randomised) | Yes | Yes | Yes        | Yes | 4 |
| Wahl et al (2004)           | Cross sectional<br>(Quantitative descriptive)    | Yes | Yes | Yes        | Yes | 4 |
| Wahl et al (2005)           | Longitudinal<br>(Quantitative descriptive)       | Yes | Yes | Yes        | Yes | 4 |
| Wahl et al (2007)           | Longitudinal<br>(Quantitative descriptive)       | Yes | Yes | Yes        | Yes | 4 |
| Wang et al (2012)           | Cross sectional<br>(Quantitative non-randomised) | Yes | Yes | Yes        | Yes | 4 |
| Williams et al (1998)       | Cross sectional<br>(Quantitative non-randomised) | Yes | Yes | Yes        | Yes | 4 |
| Wong et al (2004)           | Qualitative                                      | Yes | Yes | No         | Yes | 3 |
| Wood et al (2009)           | Case-control<br>(Quantitative non-randomised)    | Yes | Yes | Yes        | Yes | 4 |
| Wood et al (2011)           | Longitudinal<br>(Quantitative descriptive)       | Yes | Yes | Yes        | Yes | 4 |
| Yanagi et al (2011)         | Cross sectional<br>(Quantitative non-randomised) | Yes | Yes | Yes        | Yes | 4 |
